# Supplementary material
Source: Springer Nature journal article supplement (https://www.springermedizin.de/resource/supplementary/12888_2012_1304_MOESM2_ESM.pdf/9479838)

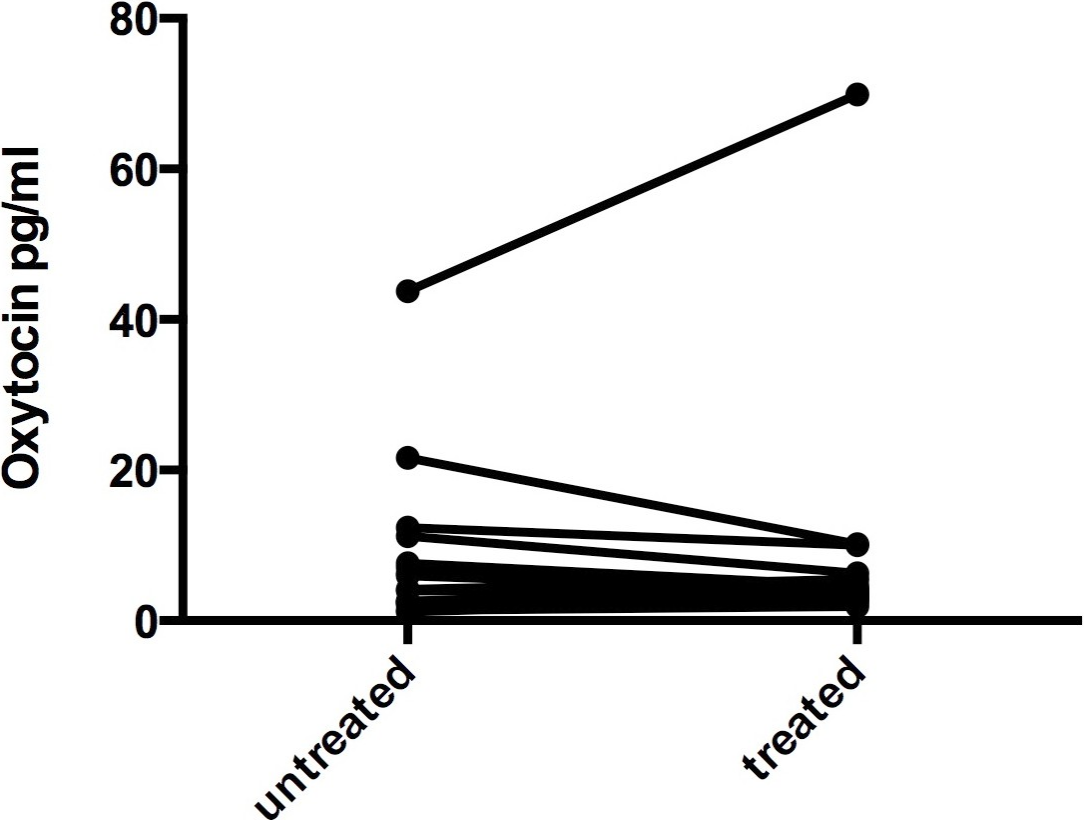

Supplement: MOESM2 [file 9479838]
